# Supplementary material for: Characterizing noninvasively conservation status of historical wet collections using spatially offset Raman spectroscopy
Source: Royal Society of Chemistry journal article supplement (doi:10.1039/d5ay01654a), 2025-12-24

Supplementary information for:

## **Characterizing Noninvasively Conservation Status of Historical Wet Collections using Spatially Offset Raman Spectroscopy**

Wren Montgomery<sup>\*a</sup>, Chelsea McKibbin<sup>a</sup>, Ana Blanco<sup>b</sup>, Sam Walker<sup>b</sup>, James Maclaine<sup>a</sup>, Roberto Portela Miguez<sup>a</sup>, Patrick Campbell<sup>a</sup>, Robert Stokes<sup>b</sup>, Pavel Matousek<sup>c</sup> and Sara Mosca<sup>\*c</sup>

---

<sup>a</sup> Science Innovation Platforms, Department of Science, Natural History Museum, Cromwell Road, London SW7 5BD, UK

<sup>b</sup> Agilent Technologies LDA UK, Becquerel Avenue, Didcot OX11 0RA, UK

<sup>c</sup> Central Laser Facility, Research Complex at Harwell, STFC Rutherford Appleton Laboratory, UKRI, Harwell Campus, OX11 0QX, UK

<sup>\*</sup>Corresponding Authors

Sara Mosca, STFC: sara.mosca@stfc.ac.uk

Wren Montgomery, NHM: wren.montgomery@gmail.com

Table of Contents

SI1: photograph of Resolve SORS unit during in-situ measurements. Page 2-5

SI1: photograph of Res

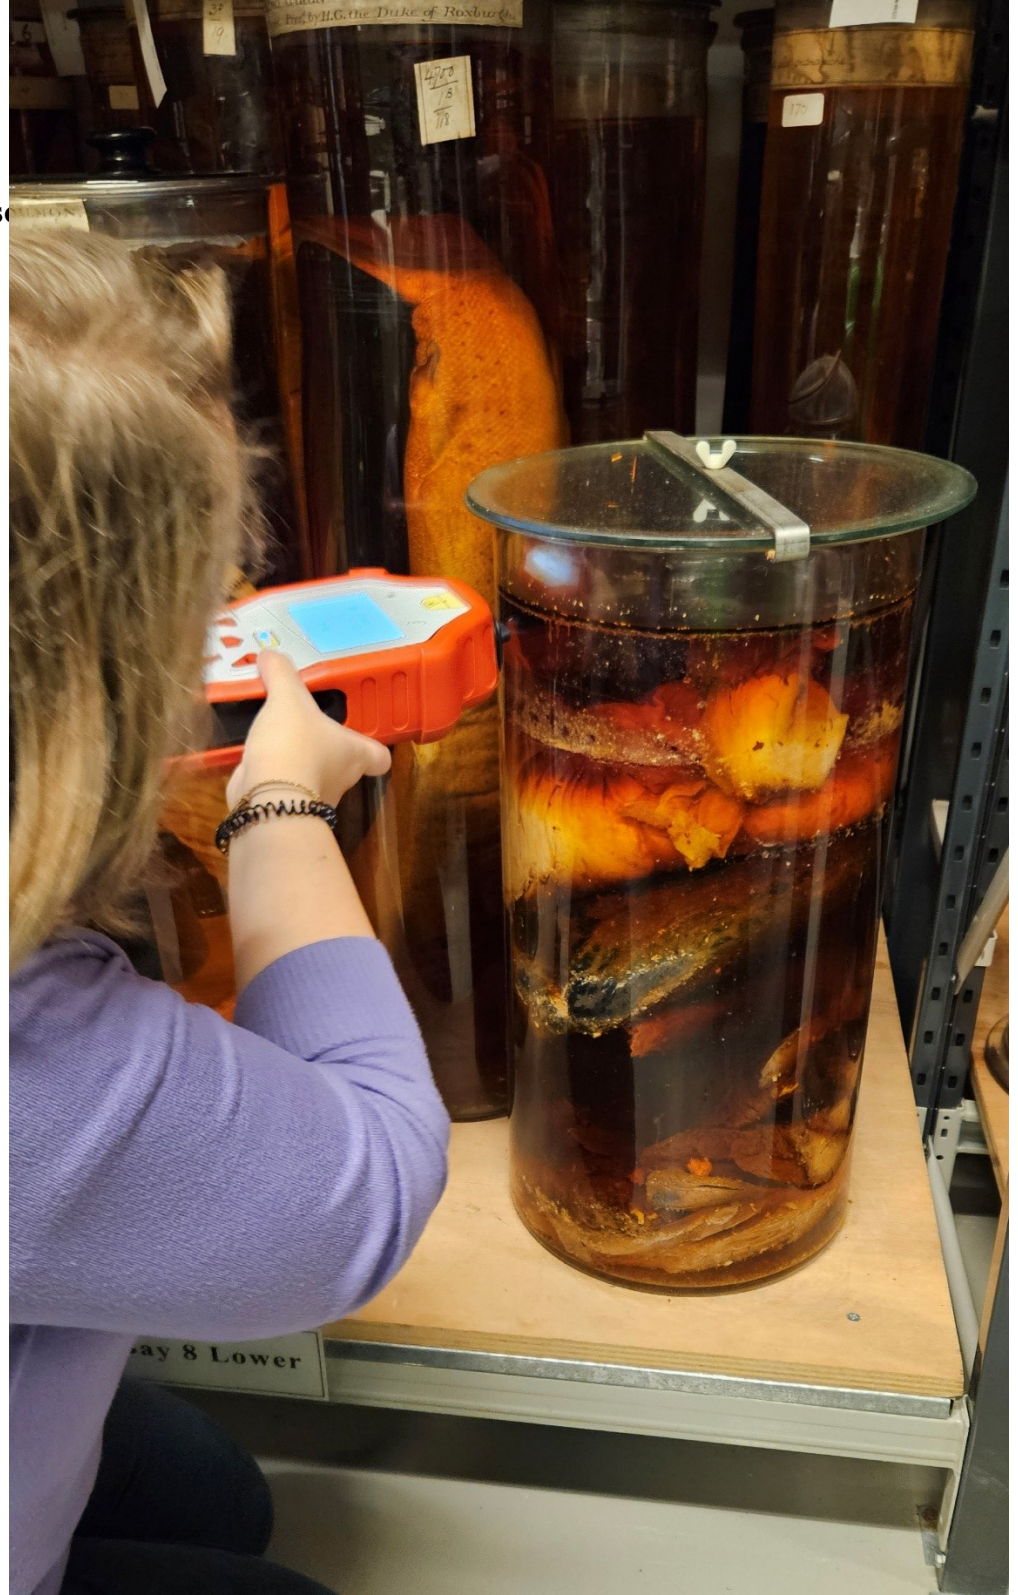



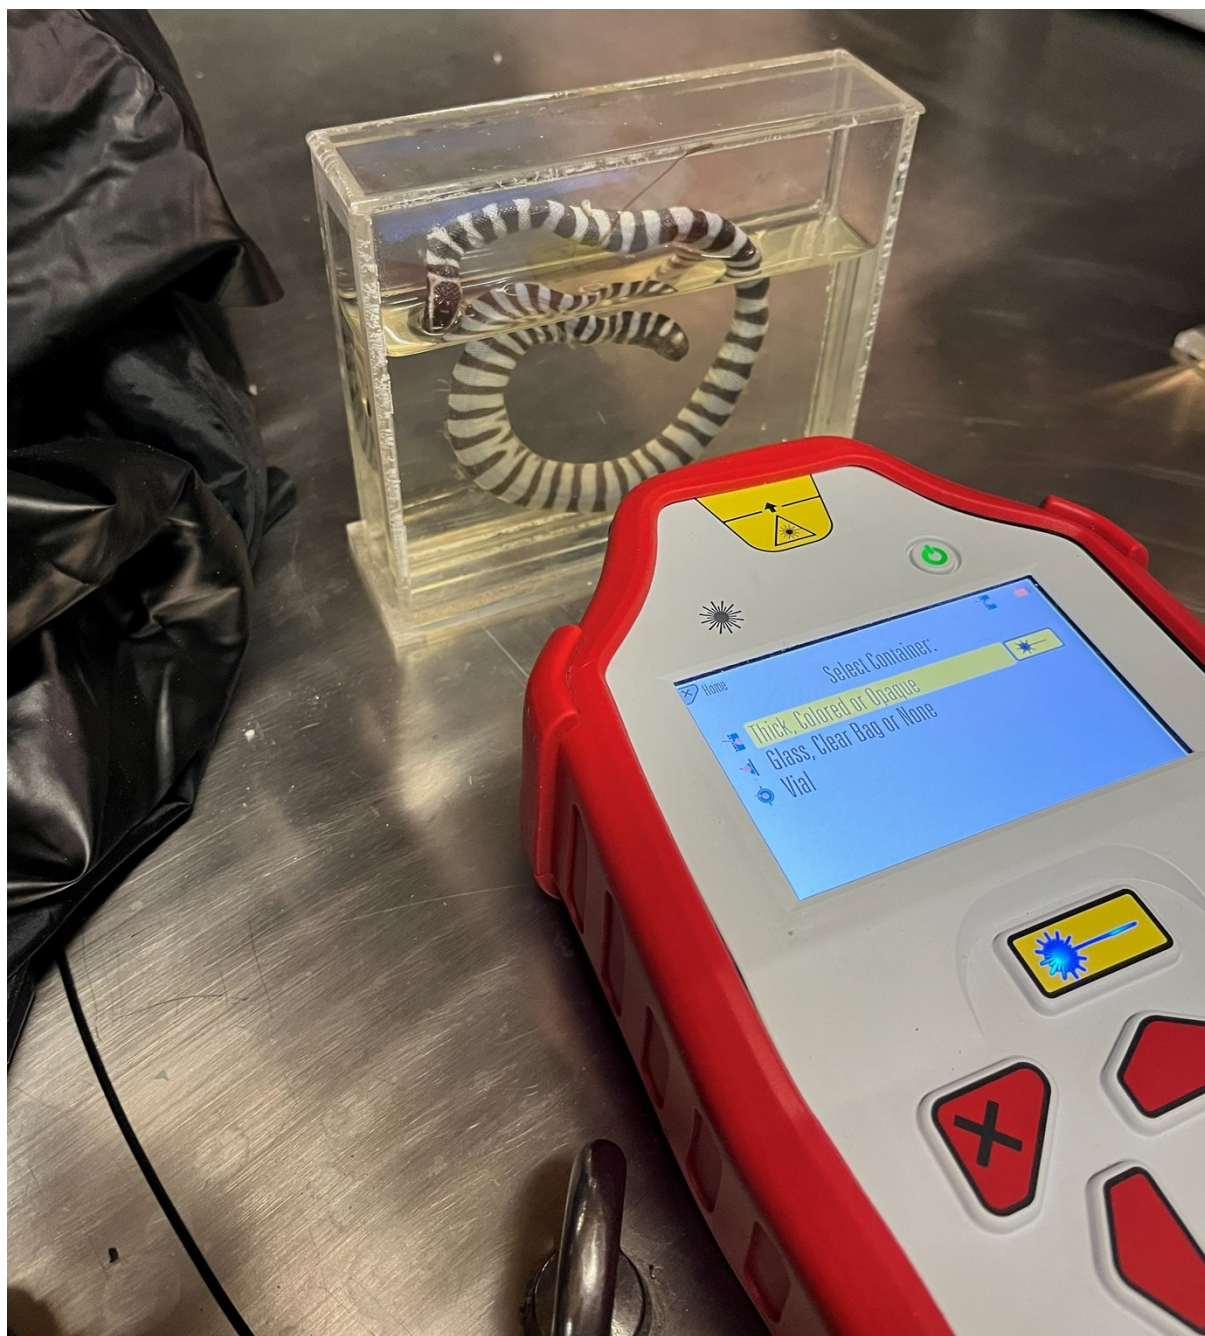

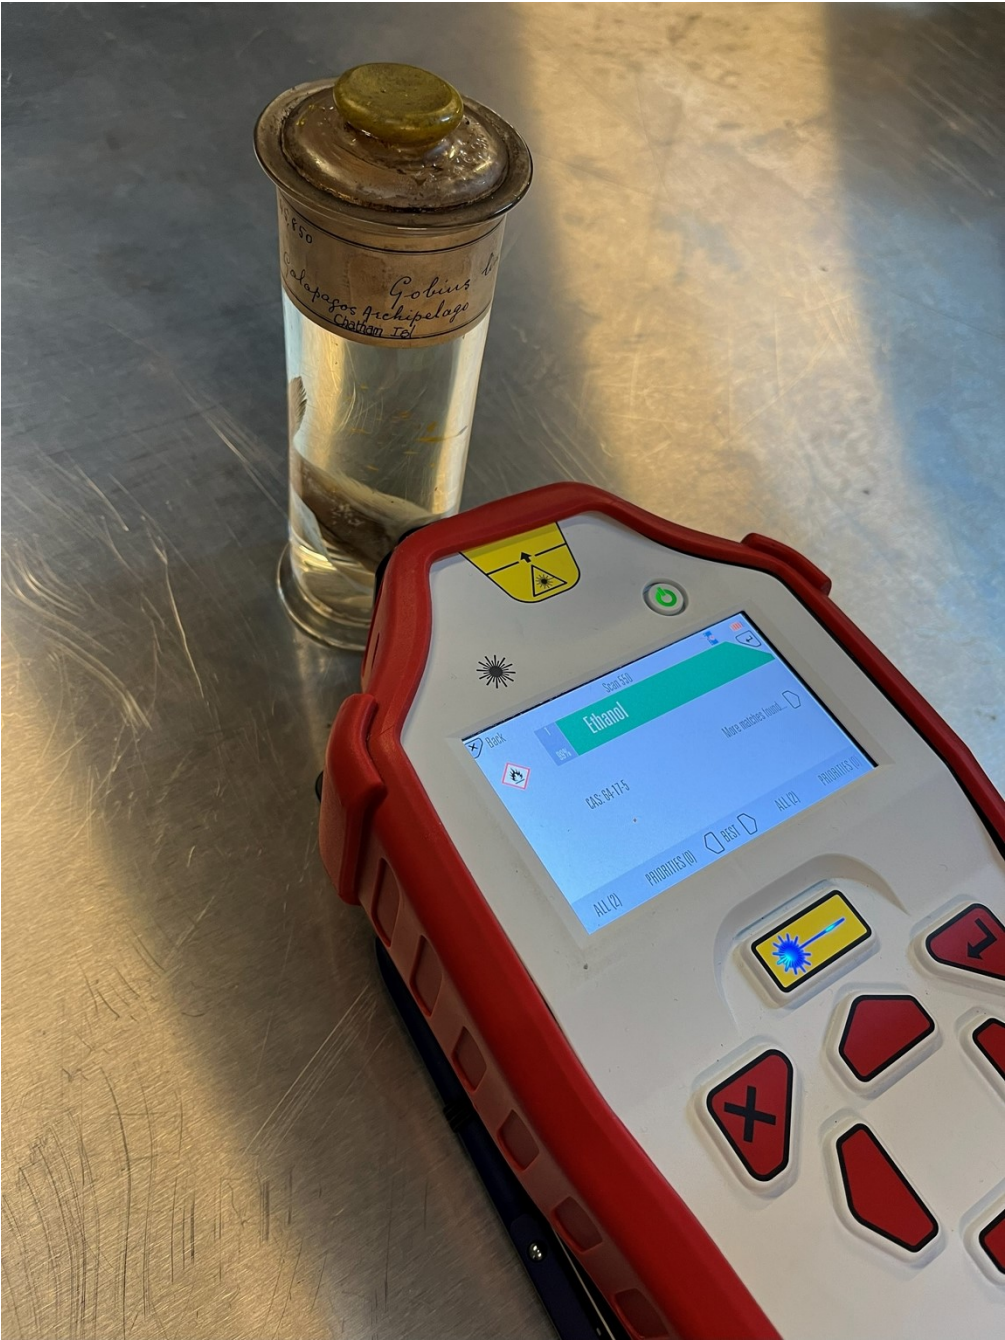



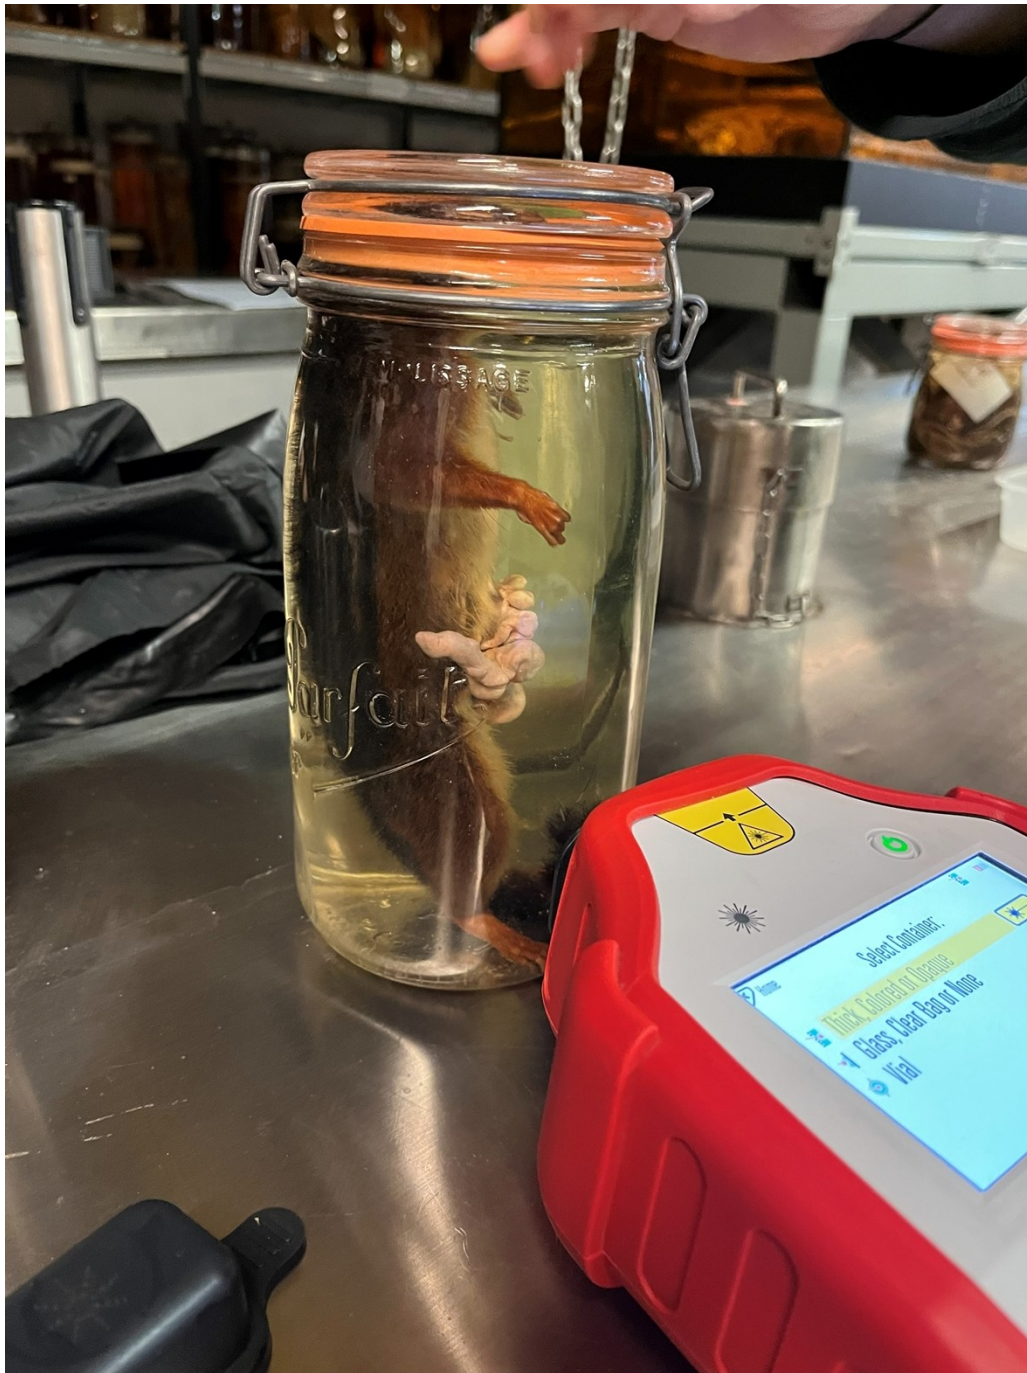

Supplement: d5ay01654a1.pdf [file d5ay01654a1.pdf]
